# Supplementary material for: Eight-Fold Interpenetrating Diamondoid Coordination Polymers for Sensing Volatile Organic Compounds and Metal Ions
Source: MDPI journal article supplement (doi:10.3390/polym13183018), 2021-09-07
Supplement: s1 [file s1]

Supplementary Information

# Eight-Fold Interpenetrating Diamondoid Coordination Polymers for Sensing Volatile Organic Compounds and Metal Ions

Venkatesan Lakshmanan <sup>1</sup>, Yi-Ting Lai <sup>1</sup>, Xiang-Kai Yang <sup>1</sup>, Manivannan Govindaraj <sup>1</sup>, Chia-Her Lin <sup>2,\*</sup> and Jhy-Der Chen <sup>1,\*</sup>

<sup>1</sup> Department of Chemistry, Chung-Yuan Christian University, Chung Li 32023, Taiwan; venkatesanflower95@gmail.com (V.L.); e0912583362@gmail.com (Y.-T.L.); xiangkaishulin@gmail.com (X.-K.Y.); manivannanjent@gmail.com (M.G.)

<sup>2</sup> Department of Chemistry, National Taiwan Normal University, Taipei 11677, Taiwan

\* Correspondence: chiaher@ntnu.edu.tw (C.-H.L.); jdchen@cycu.edu.tw (J.-D.C.); Tel.: +886-3-265-3351 (J.-D.C.)

**Citation:** Lakshmanan, V.; Lai, Y.-T.; Yang, X.-K.; Govindaraj, M.; Lin, C.-H. Eight-Fold Interpenetrating Diamondoid Coordination Polymers for Sensing Volatile Organic Compounds and Metal Ions. *Polymers* **2021**, *13*, x. <https://doi.org/10.3390/xxxxx>

Academic Editor:

Received: date

Accepted: date

Published: date

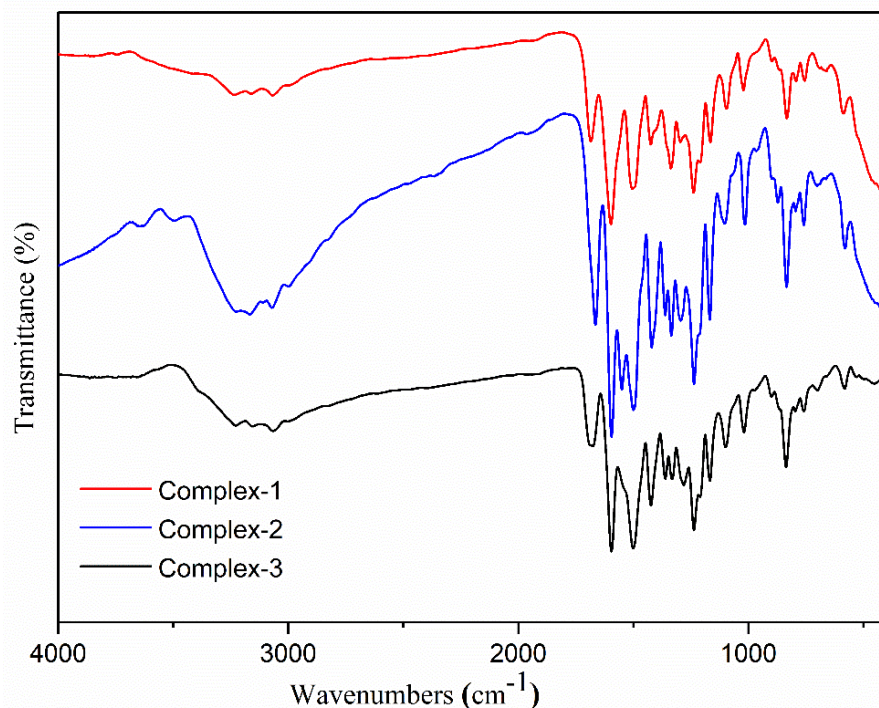

**Figure S1.** FT-IR spectra of complexes 1 - 3.

**Publisher's Note:** MDPI stays neutral with regard to jurisdictional claims in published maps and institutional affiliations.

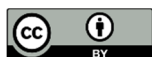

**Copyright:** © 2021 by the authors. Submitted for possible open access publication under the terms and conditions of the Creative Commons Attribution (CC BY) license (<http://creativecommons.org/licenses/by/4.0/>).

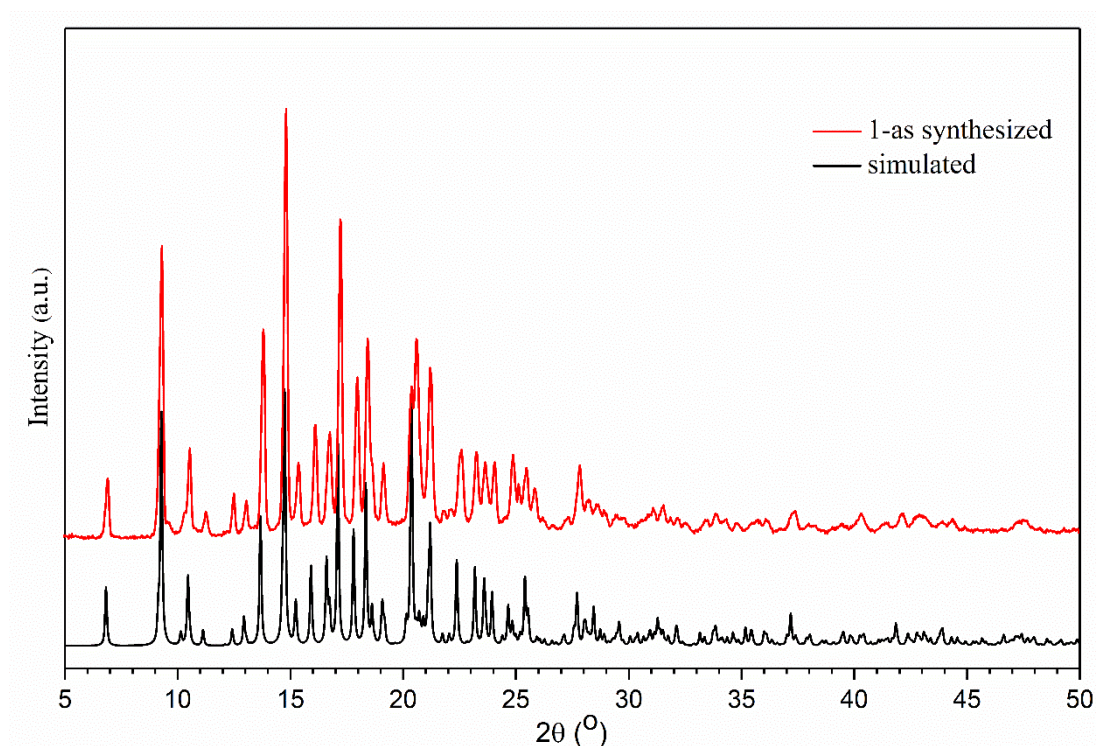

Figure S2. PXRD patterns of 1.

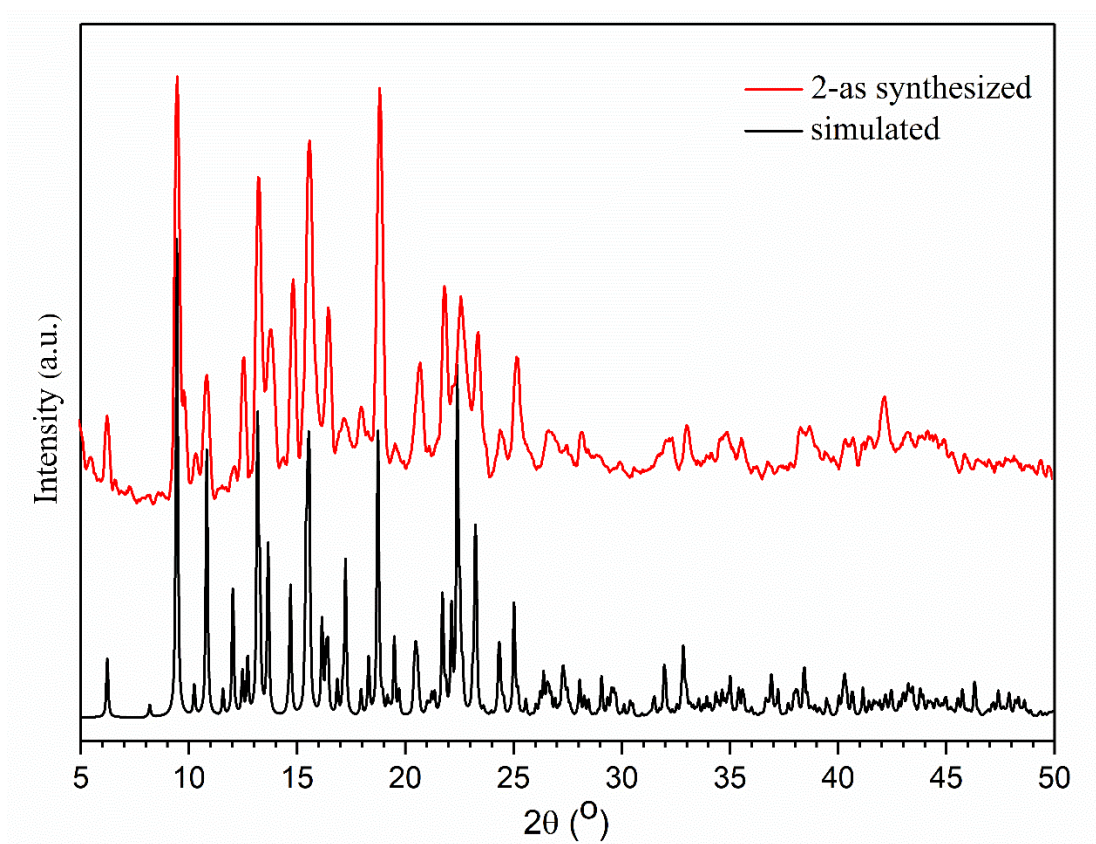

Figure S3. PXRD patterns of 2.

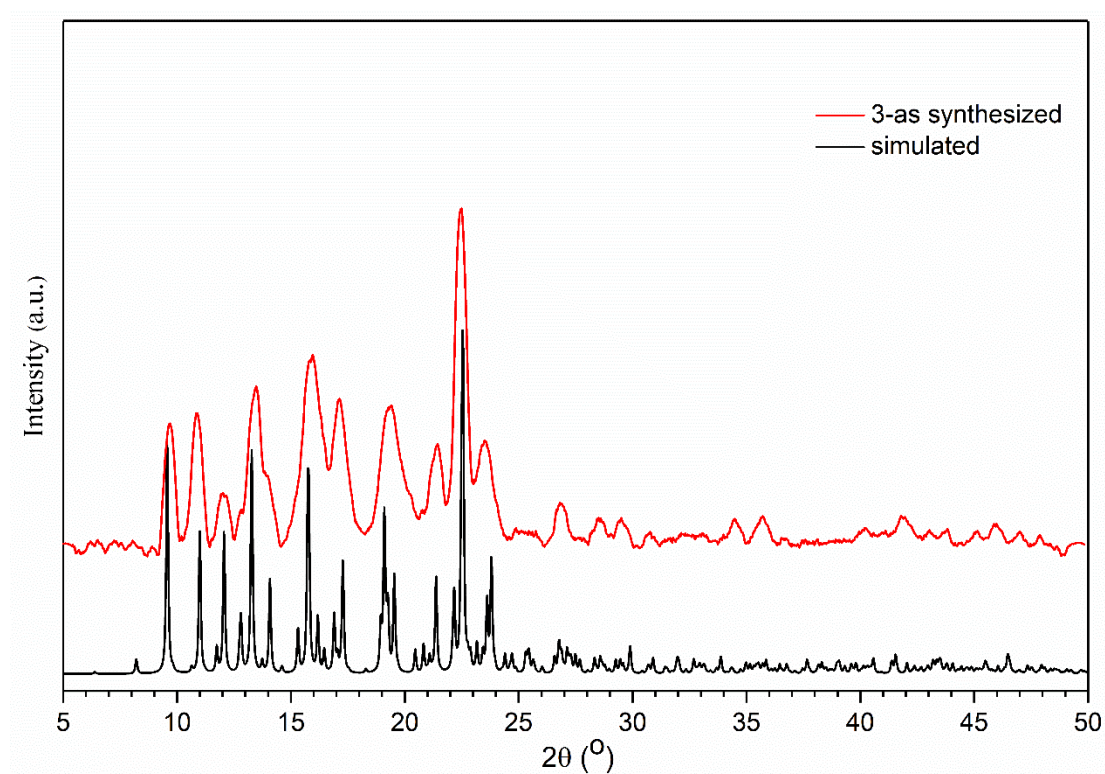

Figure S4. PXRD patterns of 3.

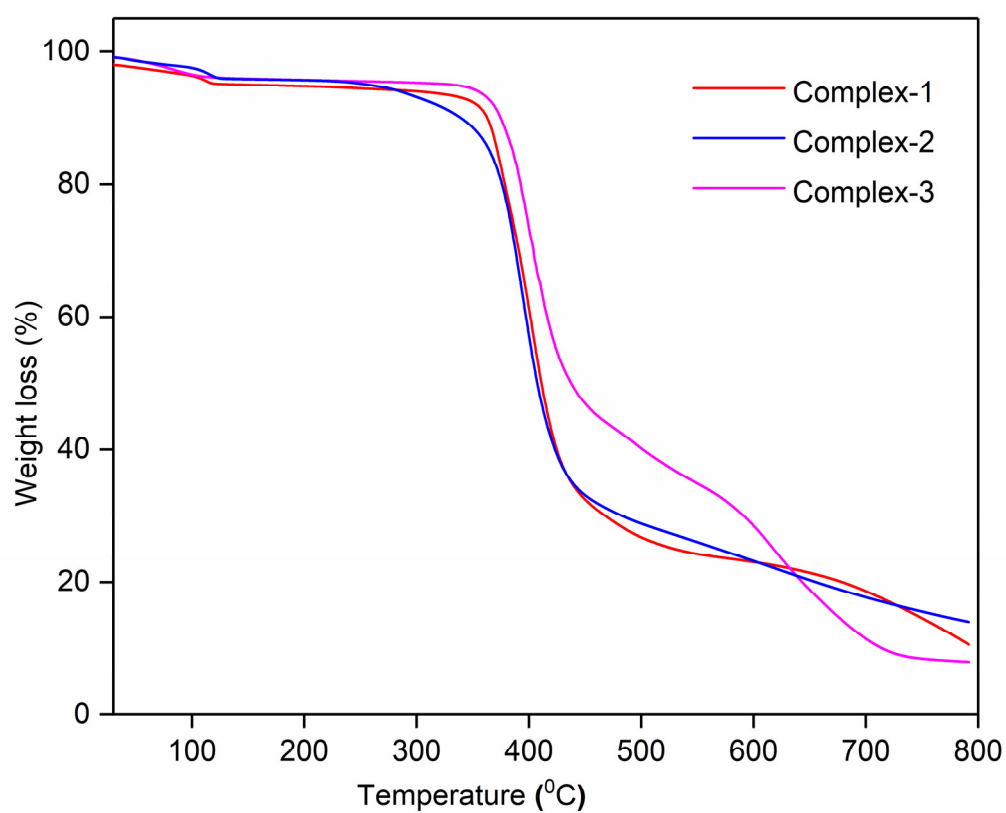

Figure S5. TGA curves for complexes 1 (red), 2 (blue) and 3 (magenta).



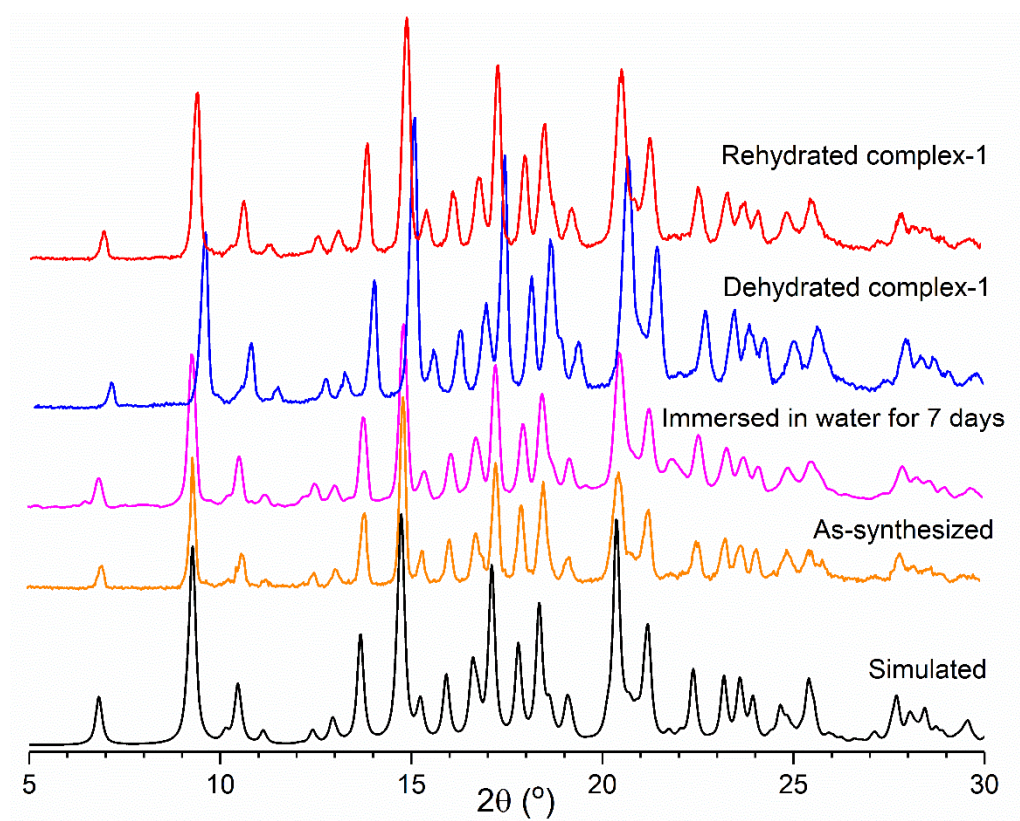

Figure S6. PXRD patterns of the dehydrated and rehydrated 1.

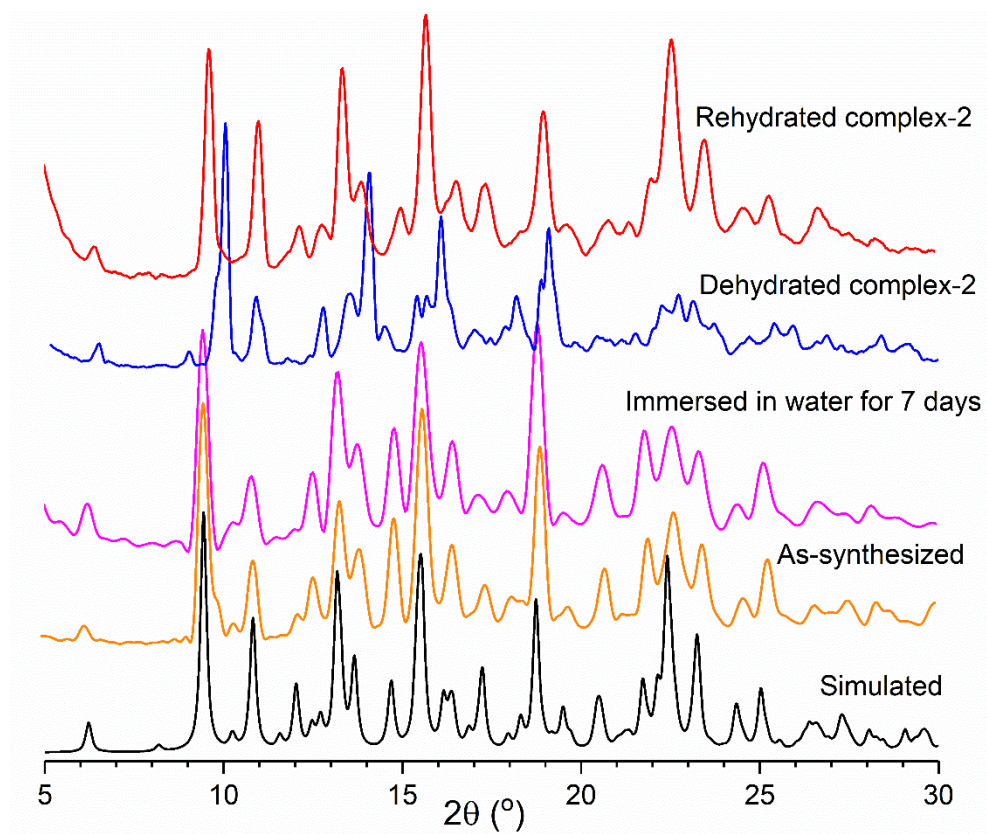

Figure S7. PXRD patterns of the dehydrated and rehydrated 2.

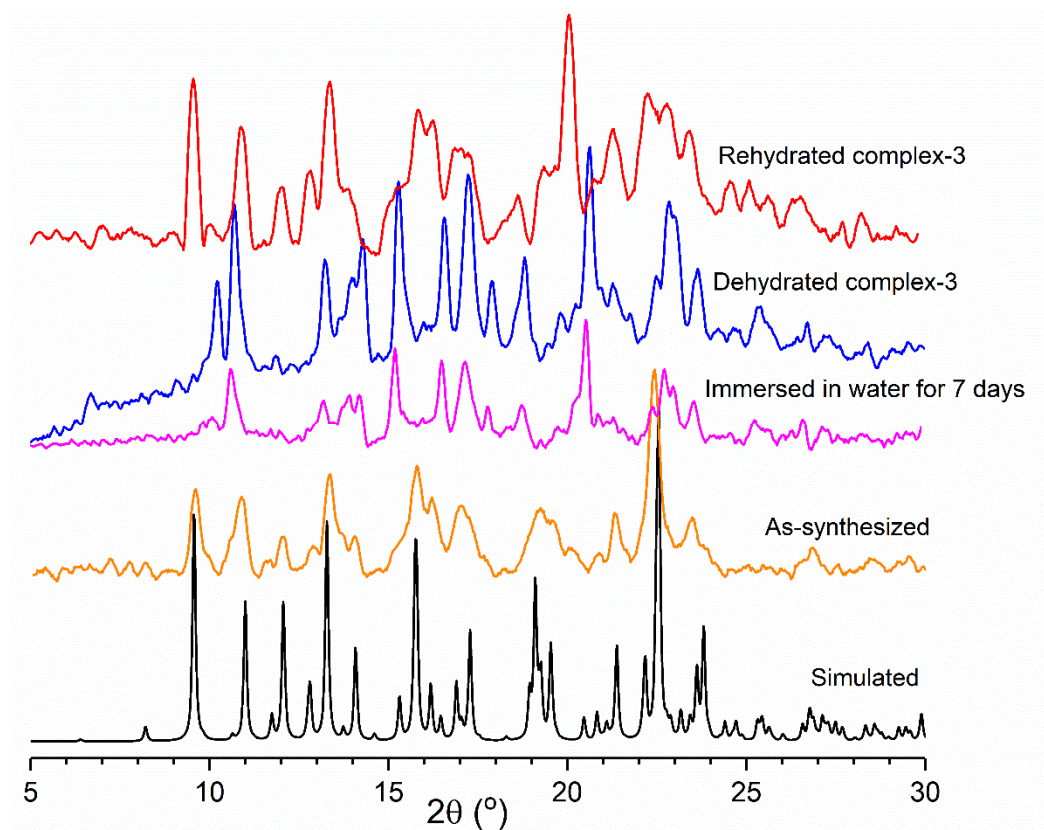

Figure S8. PXRD patterns of the dehydrated and rehydrated 3.

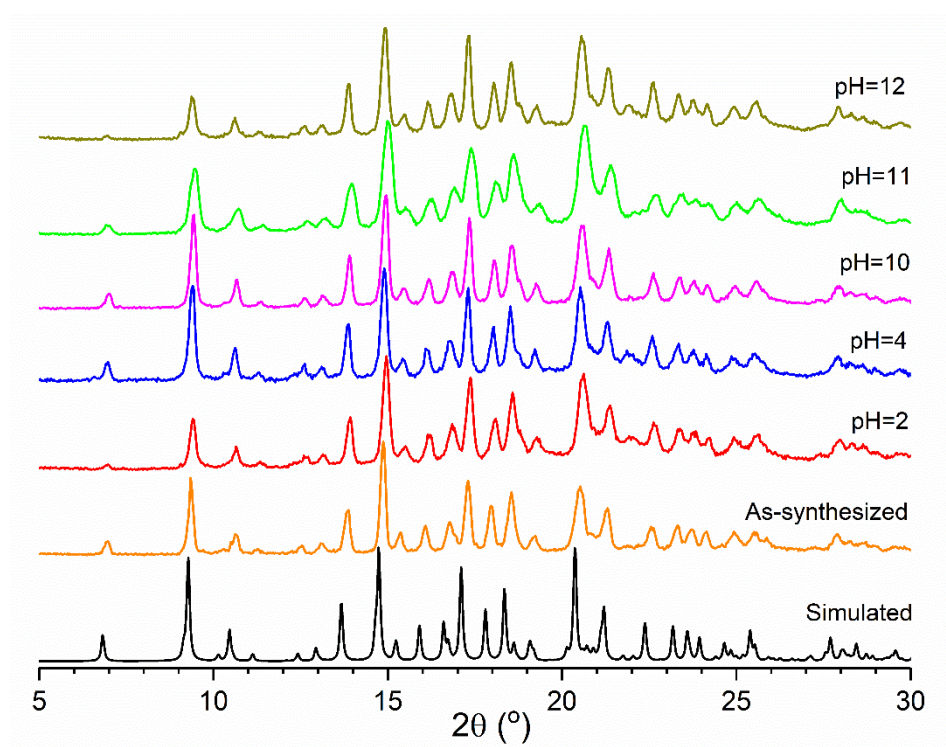

Figure S9. PXRD patterns of complex 1 in various pH values.



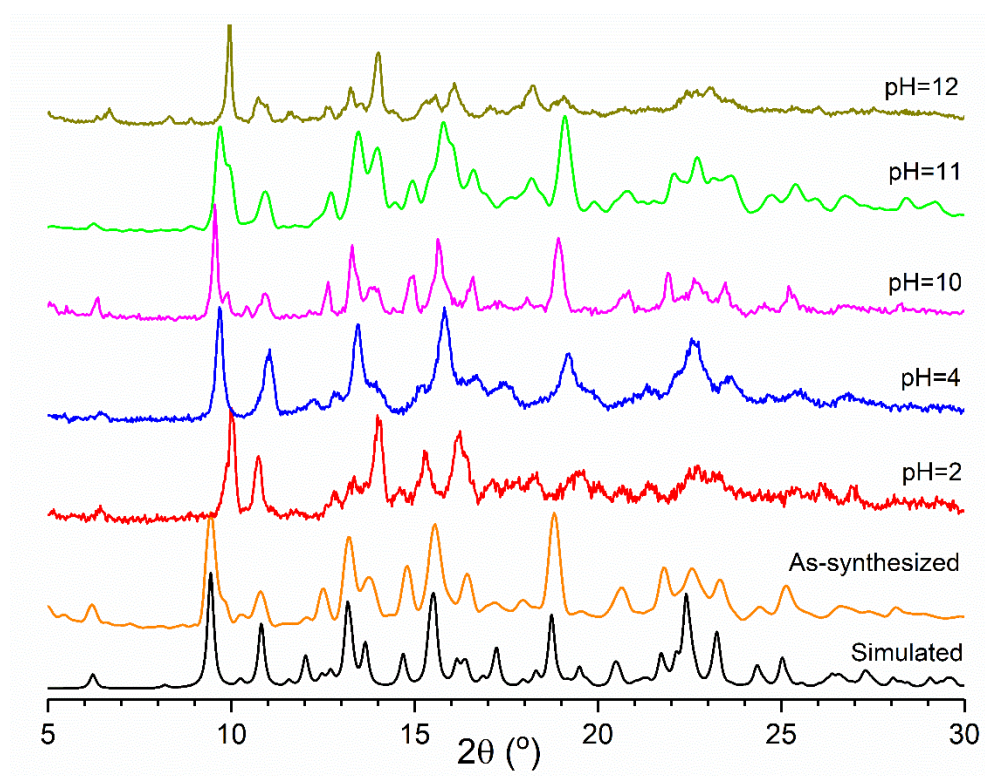

Figure S10. PXRD patterns of complex 2 in various pH values.

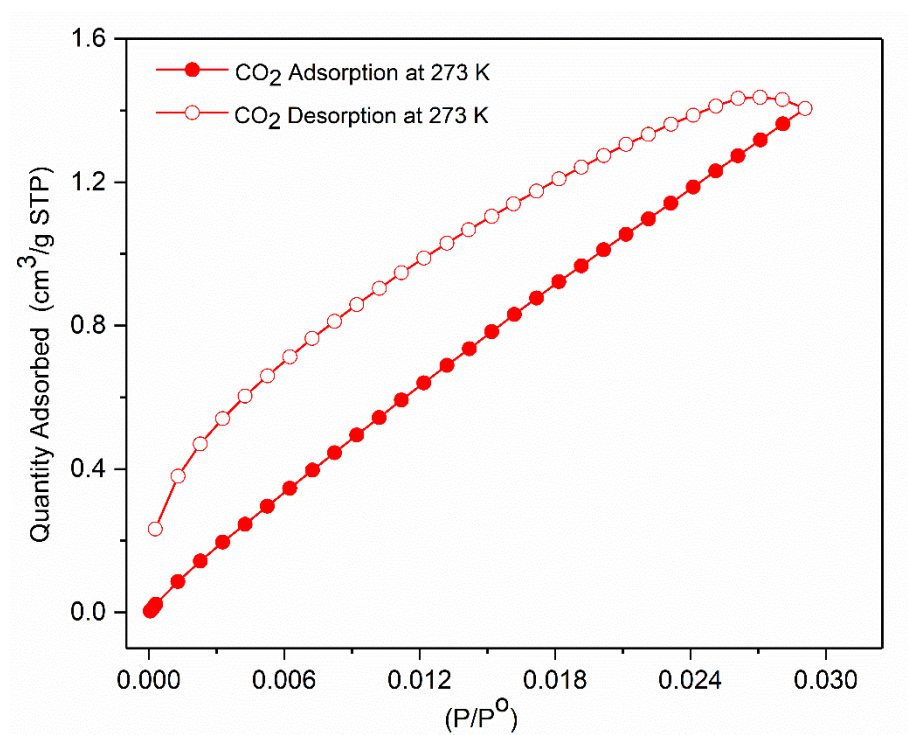

(a).

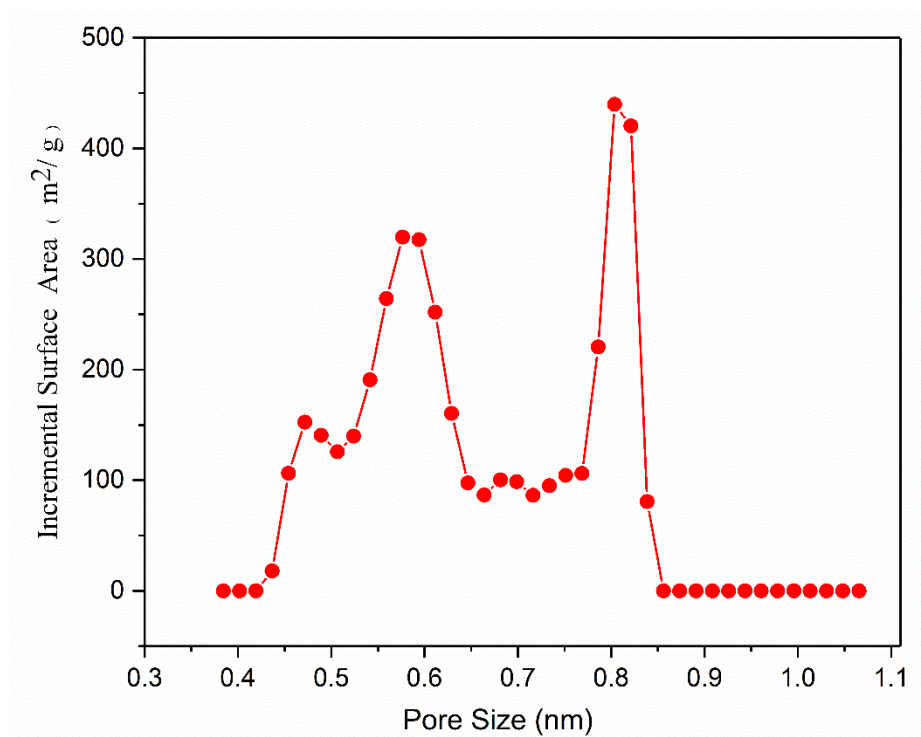

(b).

**Figure 11.** (a) CO<sub>2</sub> sorption isotherm of complex 1 at 273 K and (b) pore size distributions.

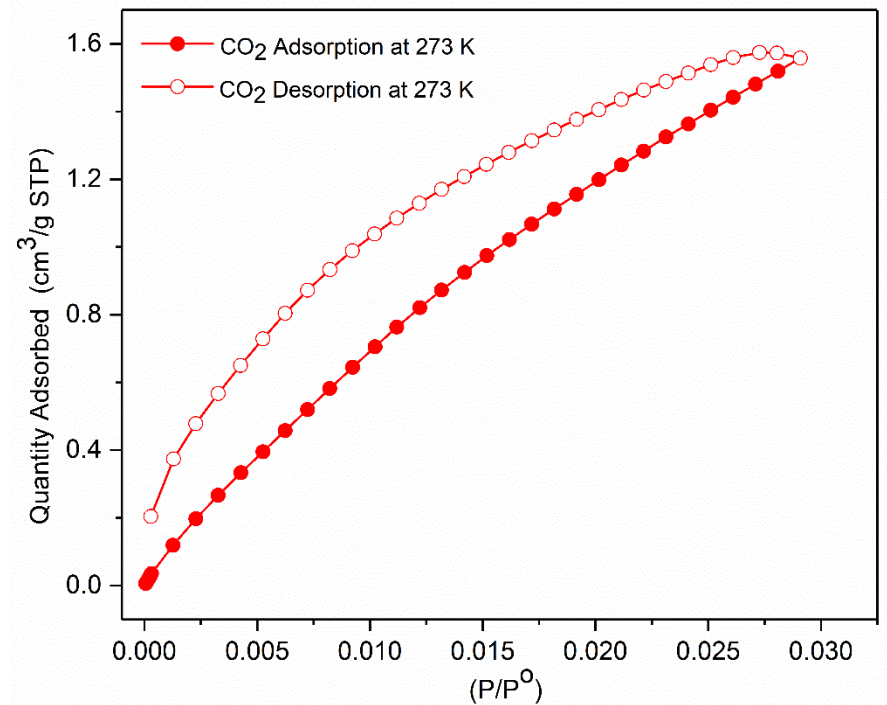

(a).



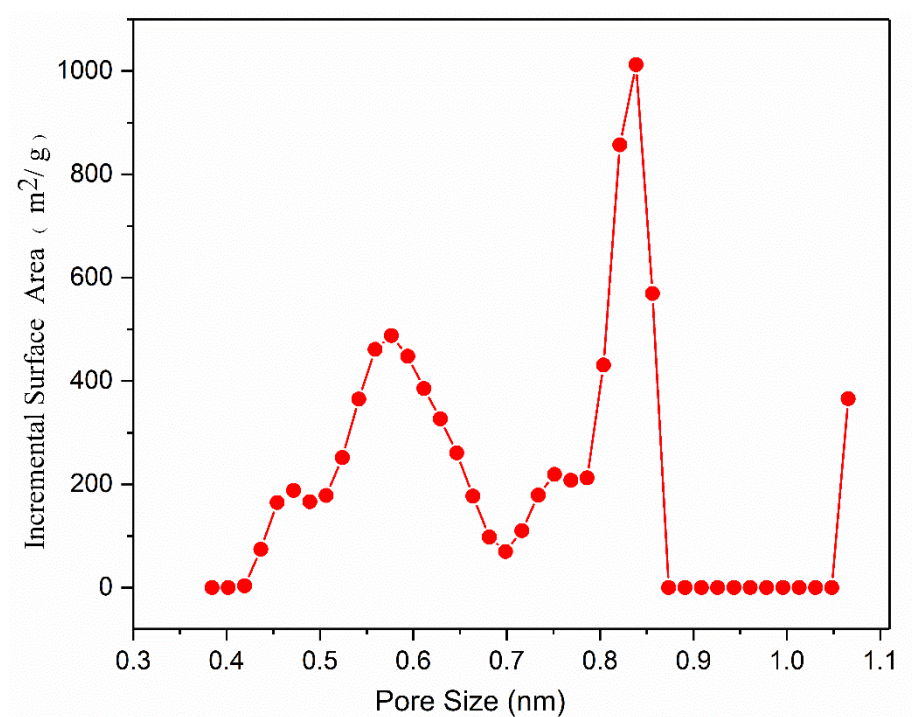

(b).

**Figure S12.** (a) CO<sub>2</sub> sorption isotherm of complex **2** at 273 K and (b) pore size distributions.

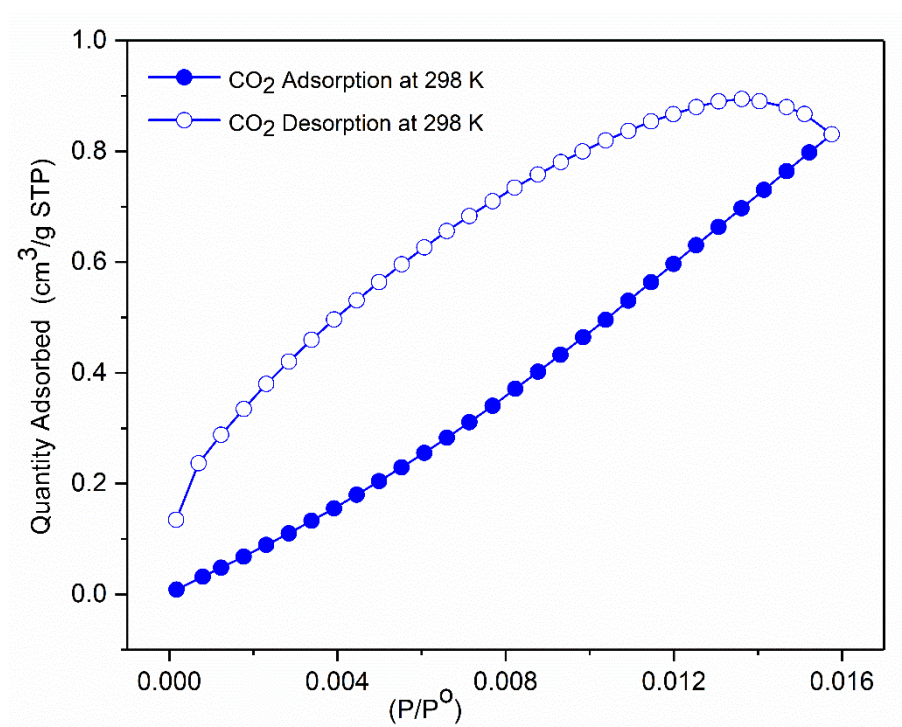

(a).



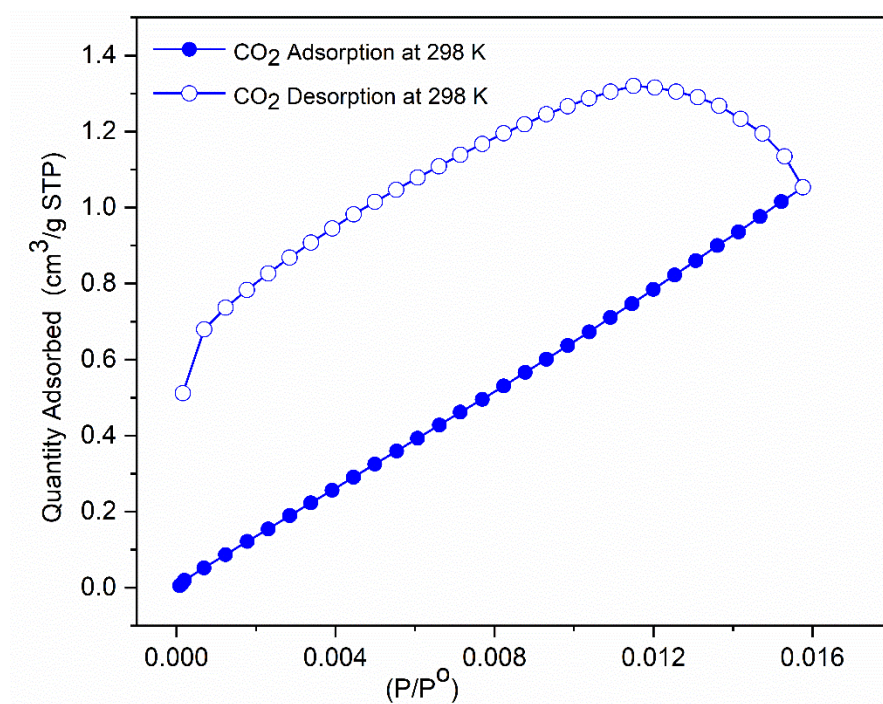

(b).

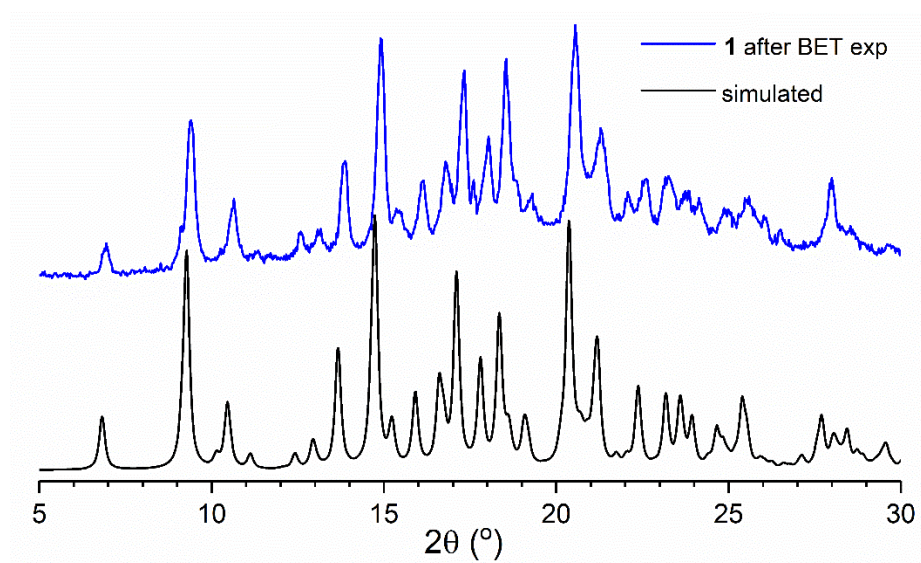

(c).

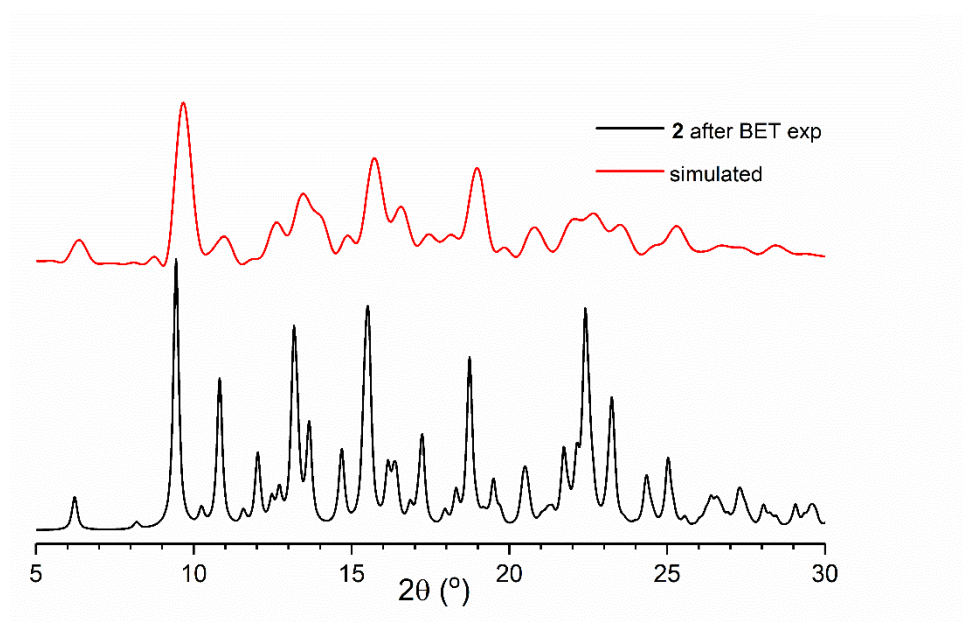

(d).

**Figure S13.** CO<sub>2</sub> sorption isotherms of complexes (a) **1** and (b) **2** at 298 K and PXRD patterns of (c) **1** and (d) **2** measured after experiments.

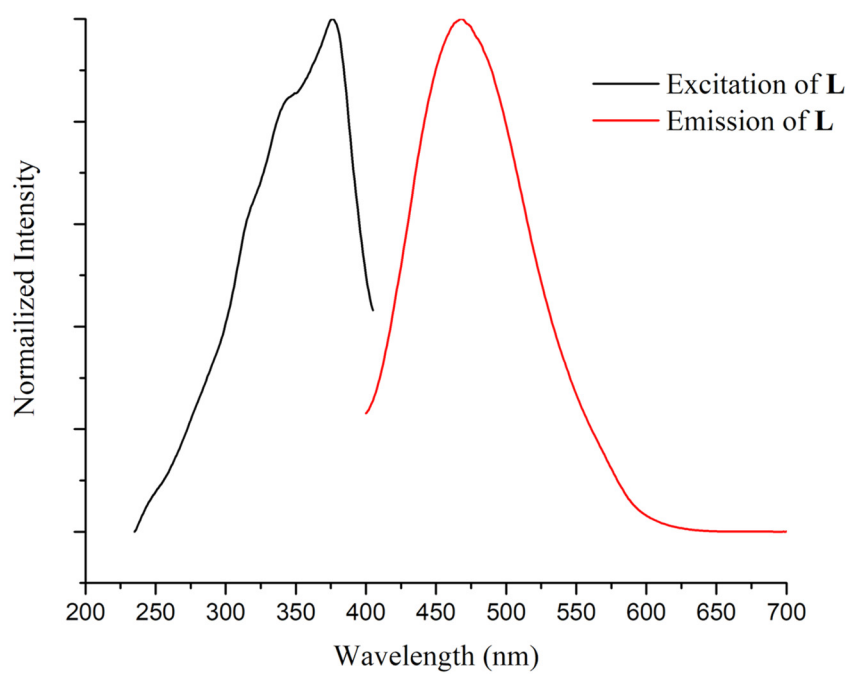

(a).



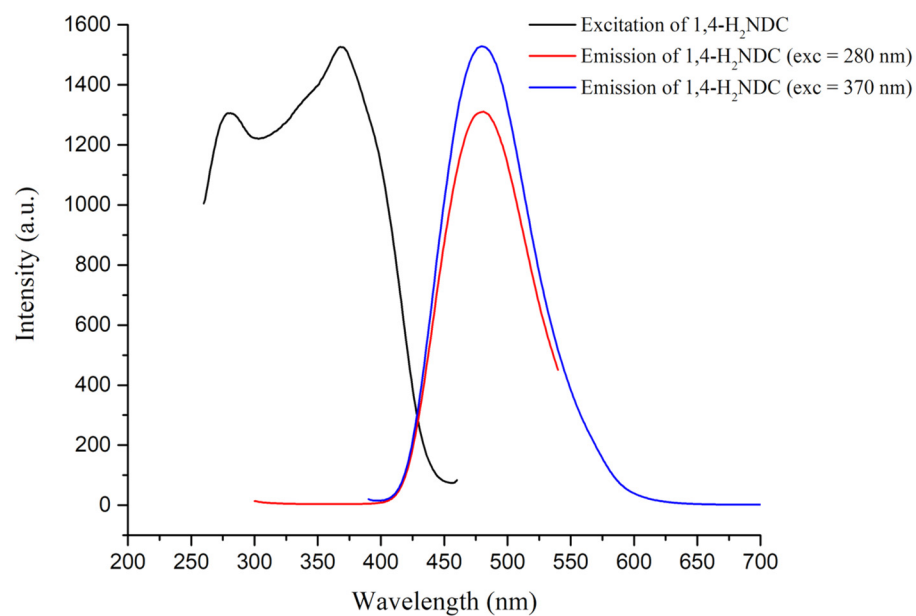

(b).

**Figure S14.** (a) Emission spectra of ligand **L** and (b) emission spectra of 1,4-H<sub>2</sub>NDC.

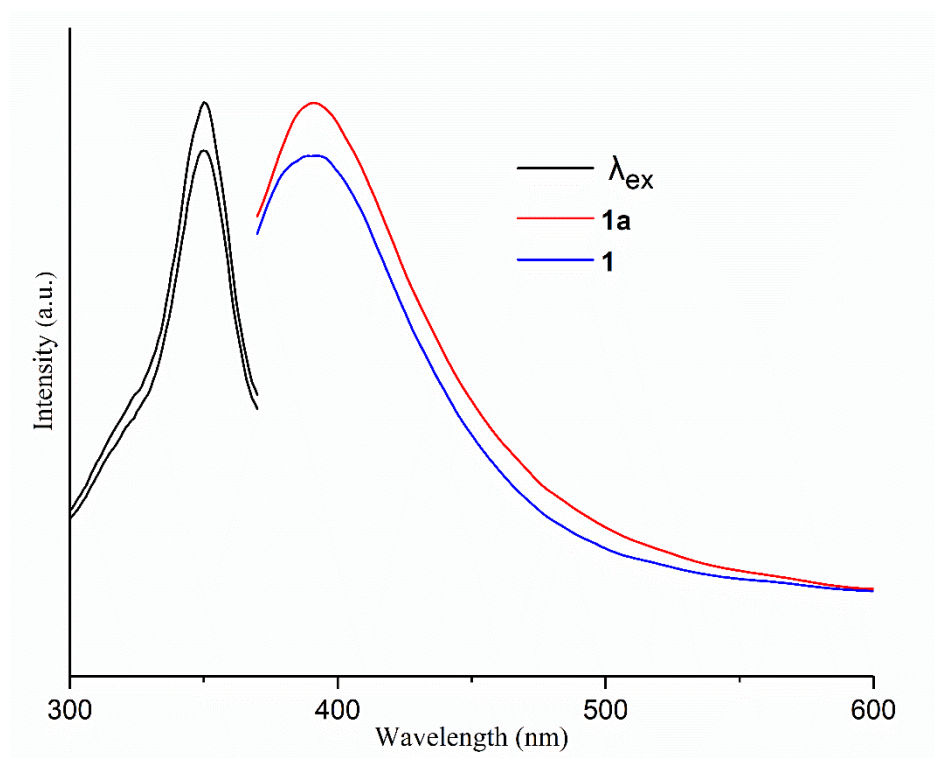

(a).

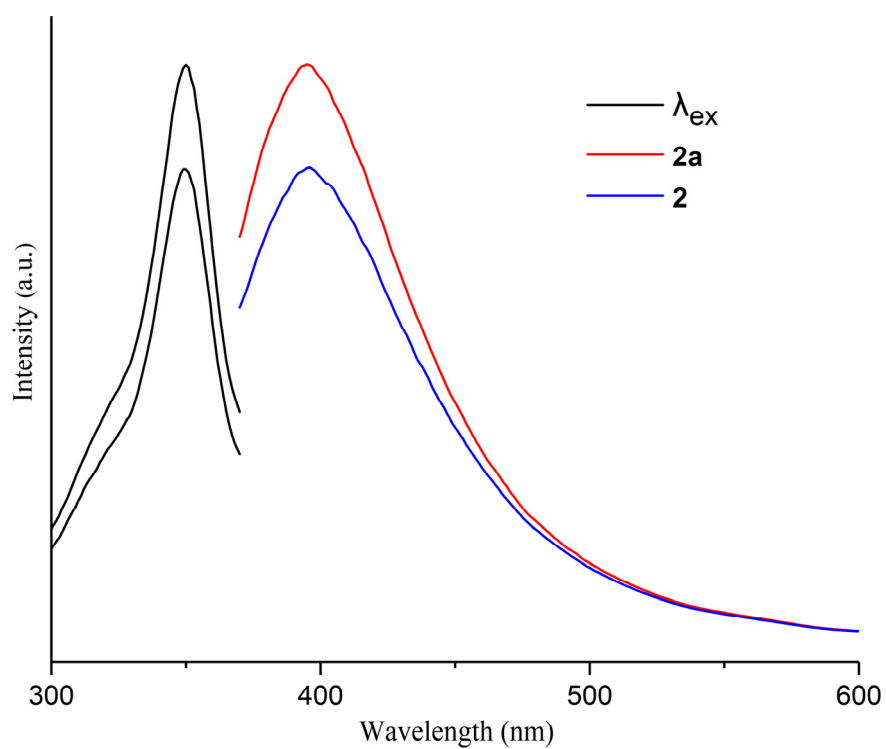

(b).

**Figure S15.** Emission spectra of (a) complex 1 and 1a and (b) complex 2 and 2a.

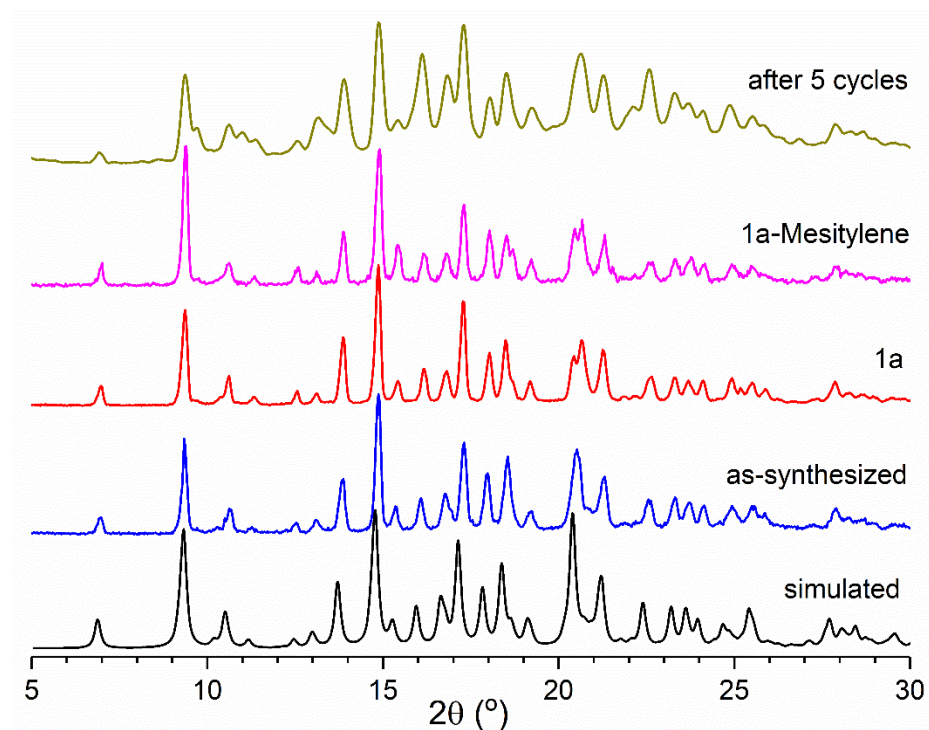

(a).



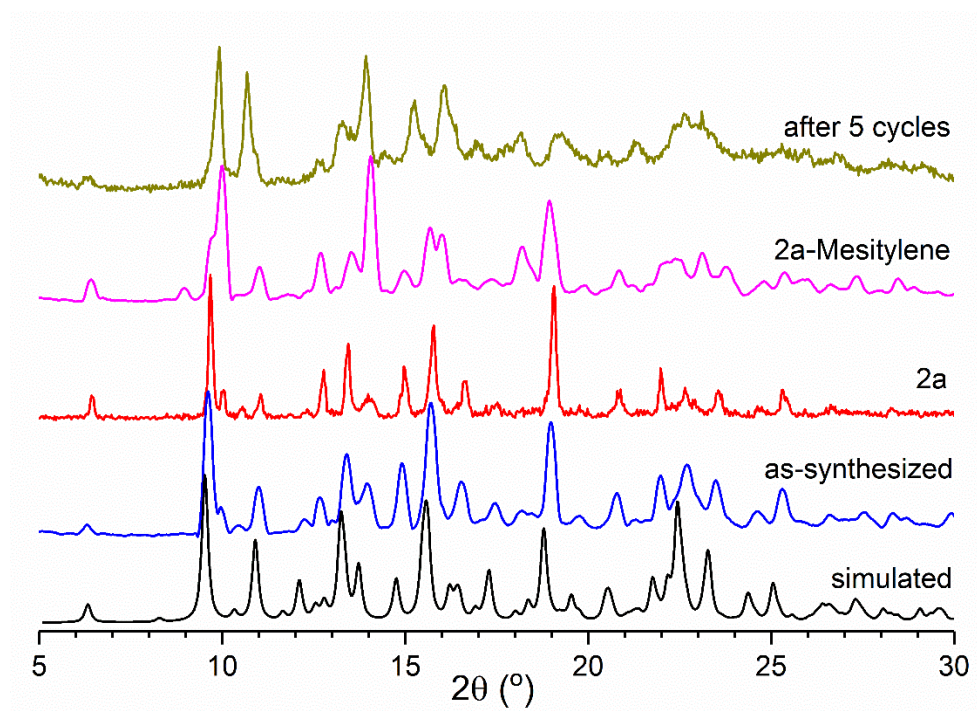

(b).

**Figure S16.** PXRD patterns for (a) **1a** and (b) **2a** before and after exposure with mesitylene.

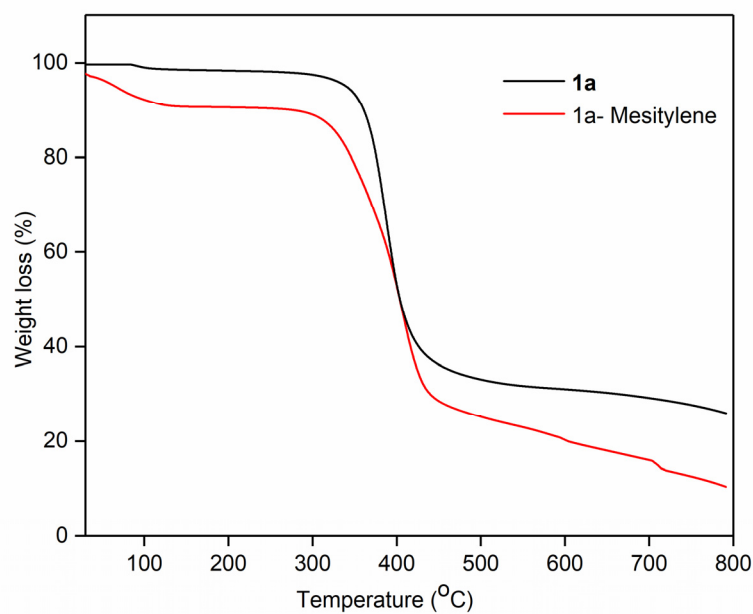

(a).

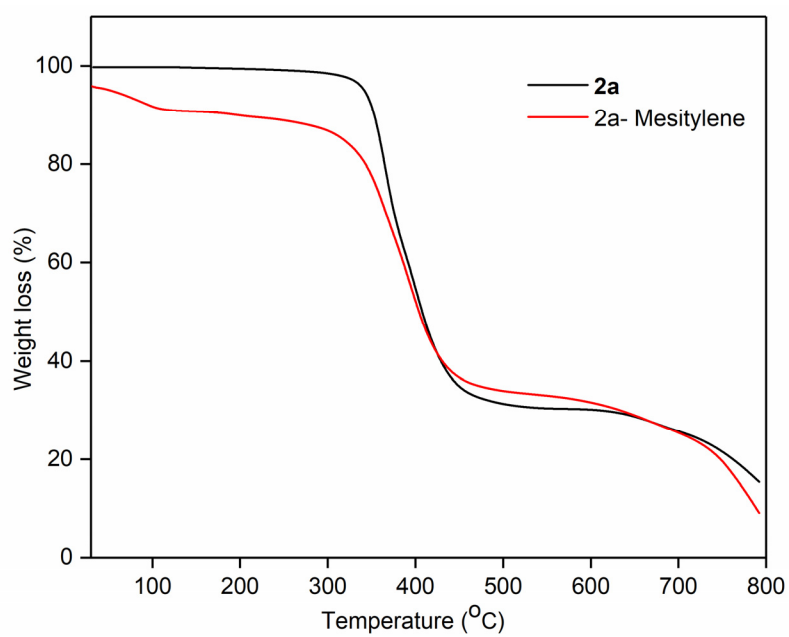

(b).

**Figure S17.** TGA curves measured for (a) **1a** and mesitylene-loaded **1a** and (b) **2a** and mesitylene-loaded **2a**.

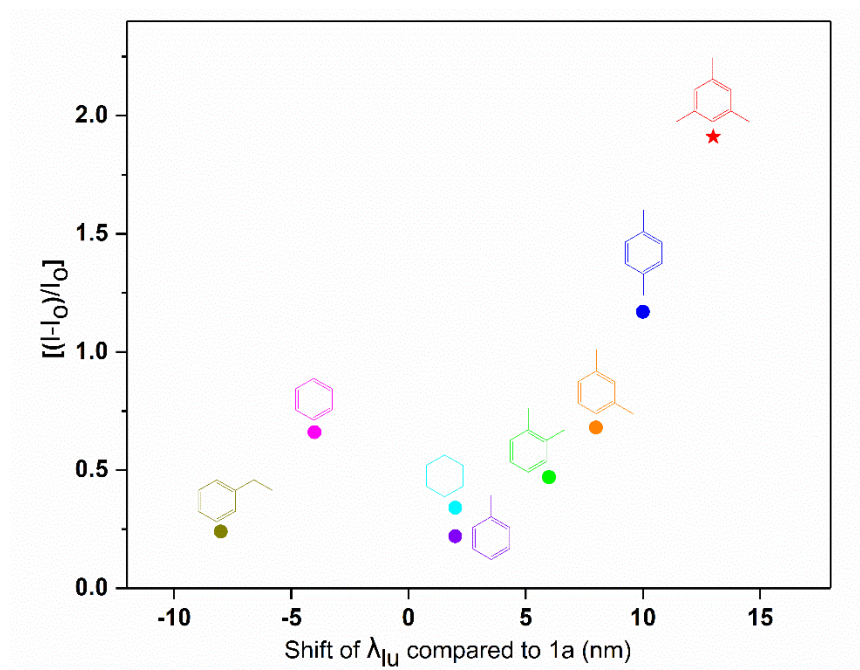

(a).



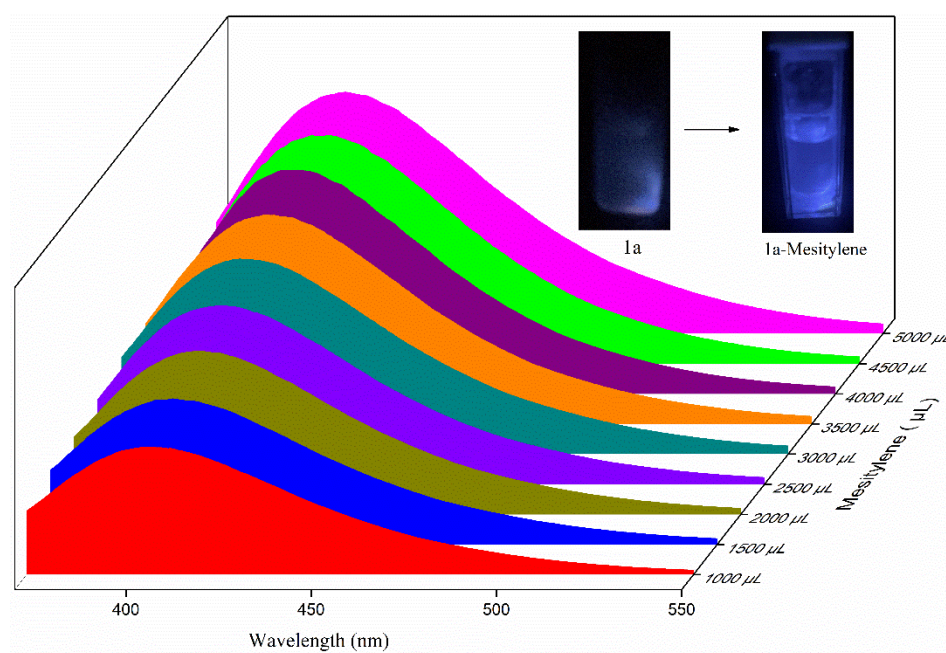

(b).

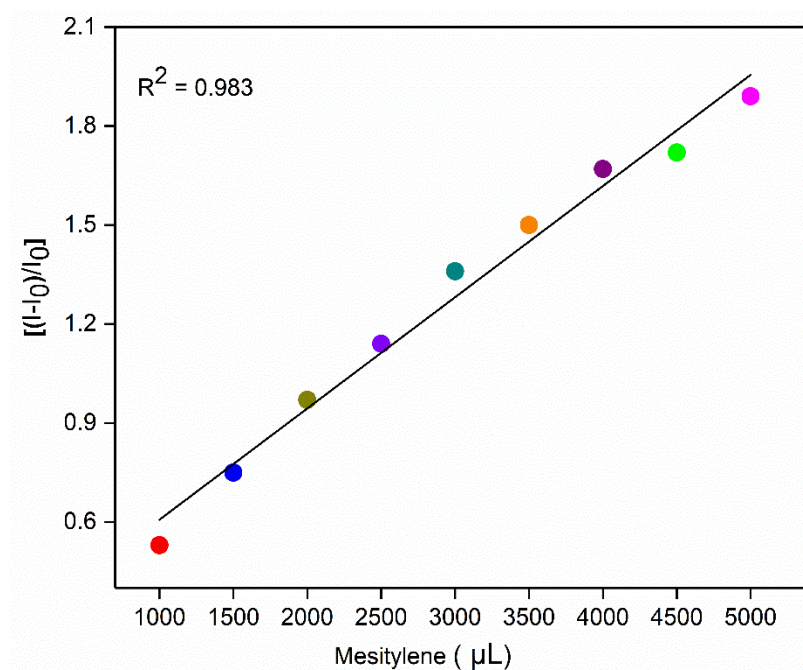

(c).

**Figure S18.** (a) The relationship of luminescence intensities of VOCs-loaded **1a** versus emission wavelength shifts of  $\lambda_{lu}$  compared to **1a**. (b) Emission spectra of **1a** with increasing amount of mesitylene upon excitation at 350 nm. (c) The calibration curves showing luminescence intensity of **1a** at different amount of mesitylene.

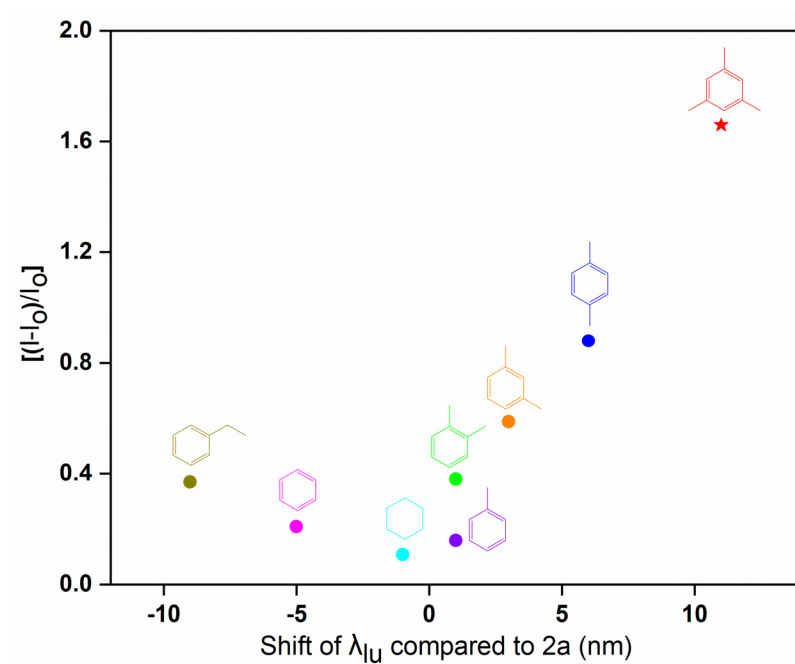

(a).

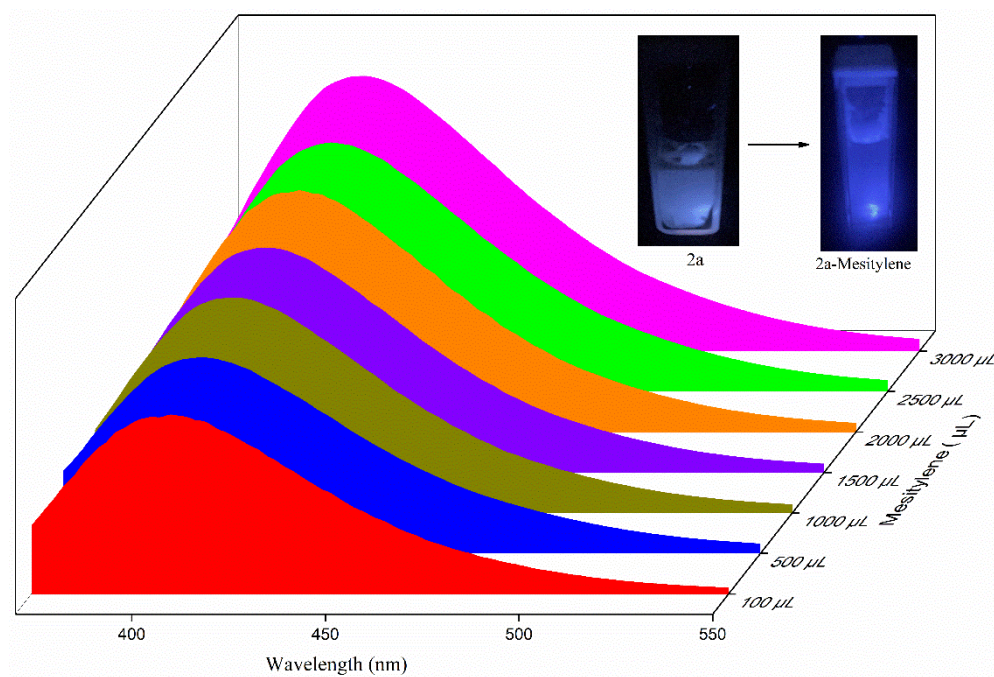

(b).

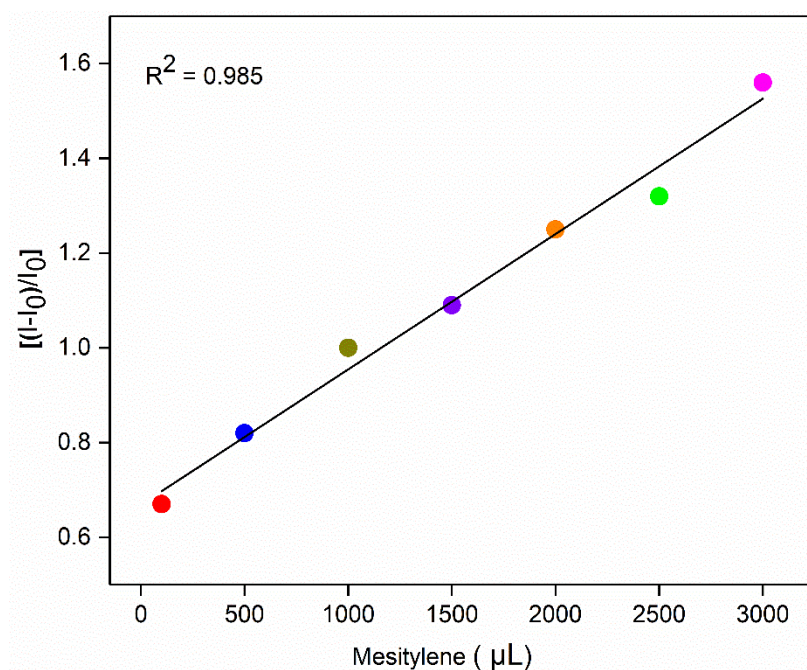

(c).

**Figure S19.** (a) The relationship of luminescence intensities of VOCs-loaded **2a** versus emission wavelength shifts of  $\lambda_{lu}$  compared to **2a**. (b) Emission spectra of **2a** with increasing amount of mesitylene upon excitation at 350 nm. (c) The calibration curves showing luminescence intensity of **2a** at different amount of mesitylene.

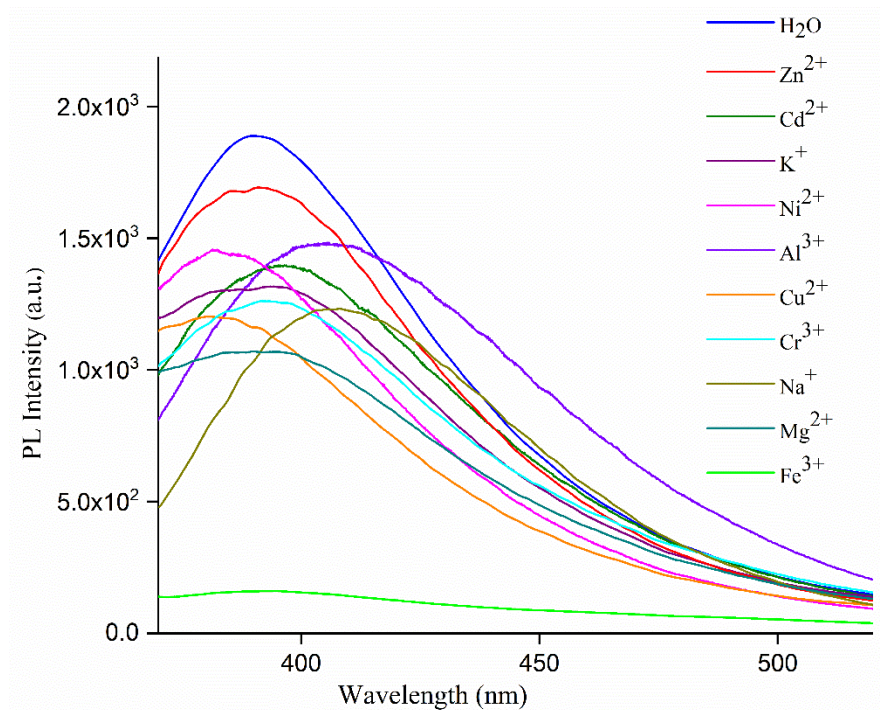

(a).



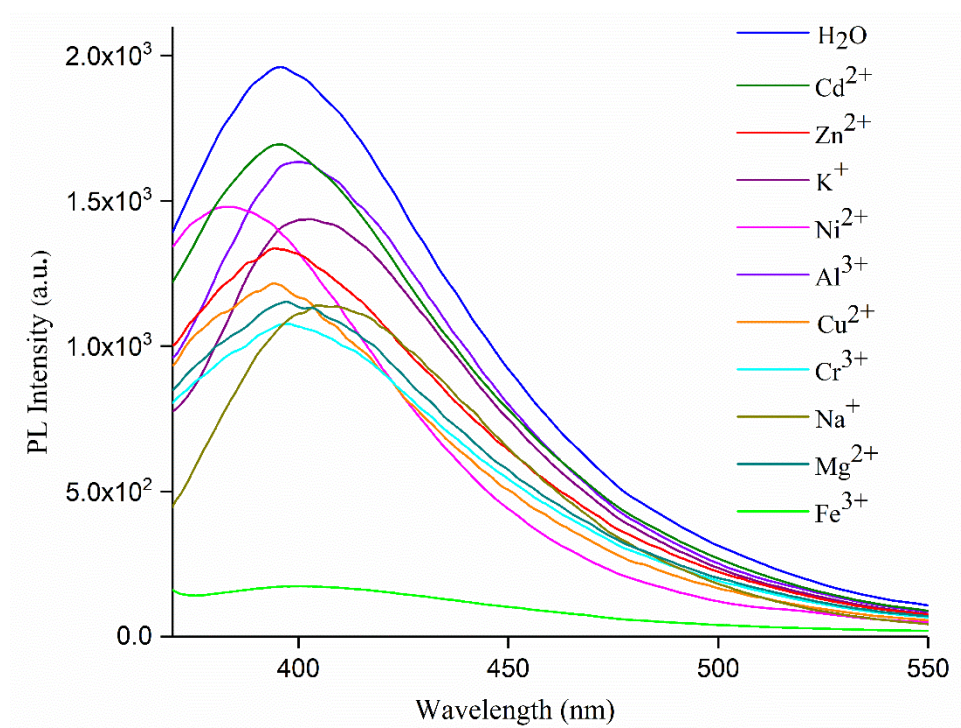

(b).

**Figure S20.** Luminescence responses towards aqueous solutions of various metal cations upon excitation at 350 nm for (a) 1 and (b) 2.

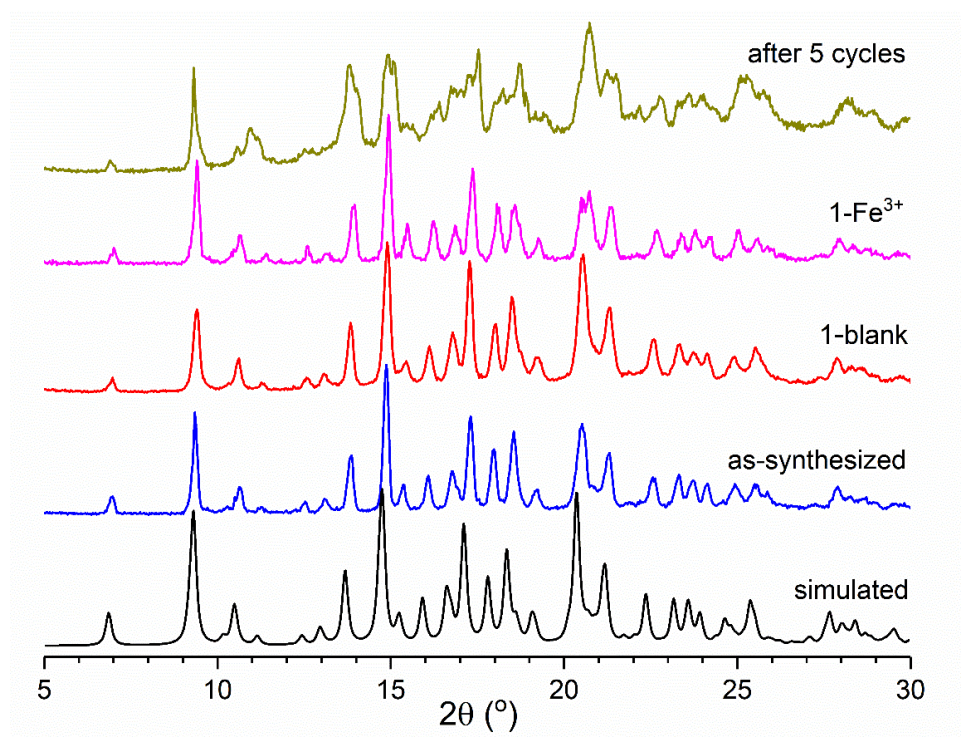

(a).

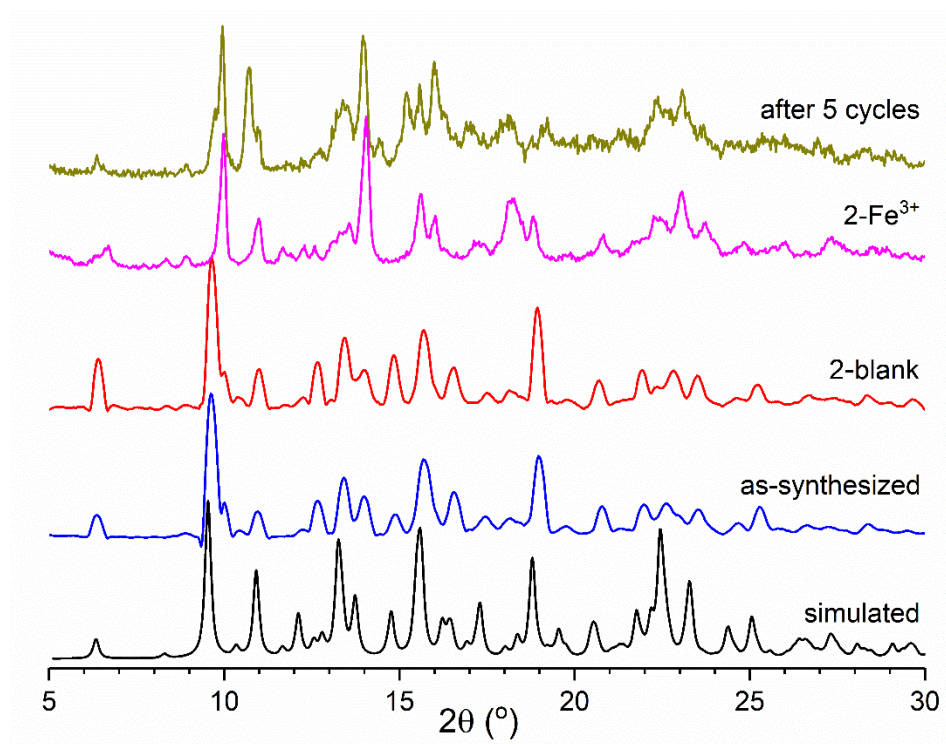

(b).

**Figure S21.** PXRD patterns before and after treatments with Fe<sup>3+</sup> ions for (a) 1 and (b) 2.

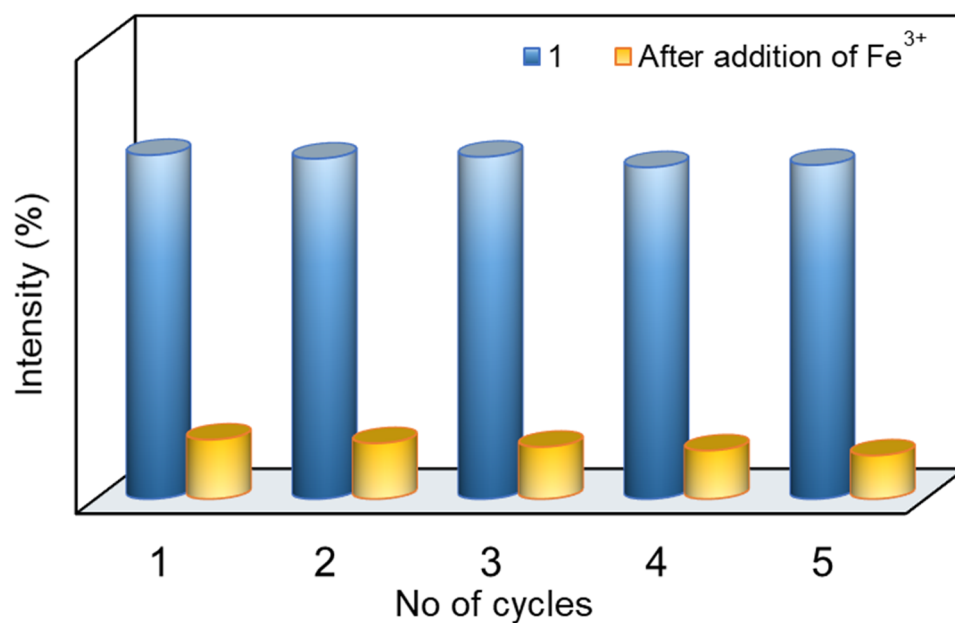

(a).

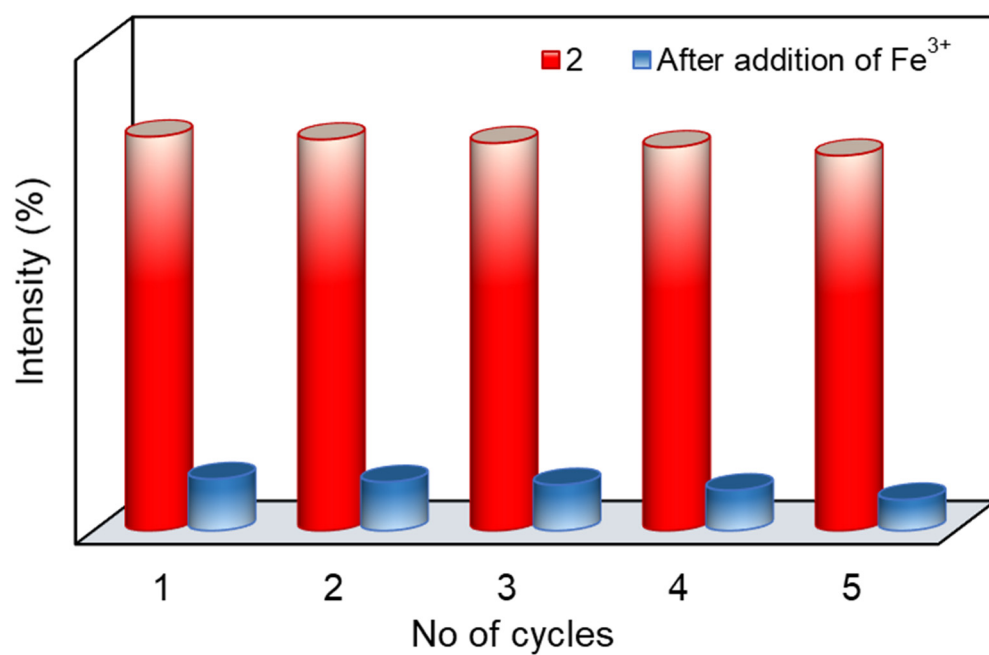

(b).

**Figure S22.** Bar diagrams showing the emission intensities of (a) 1 and (b) 2 treated with Fe<sup>3+</sup> for five repeated cycles.

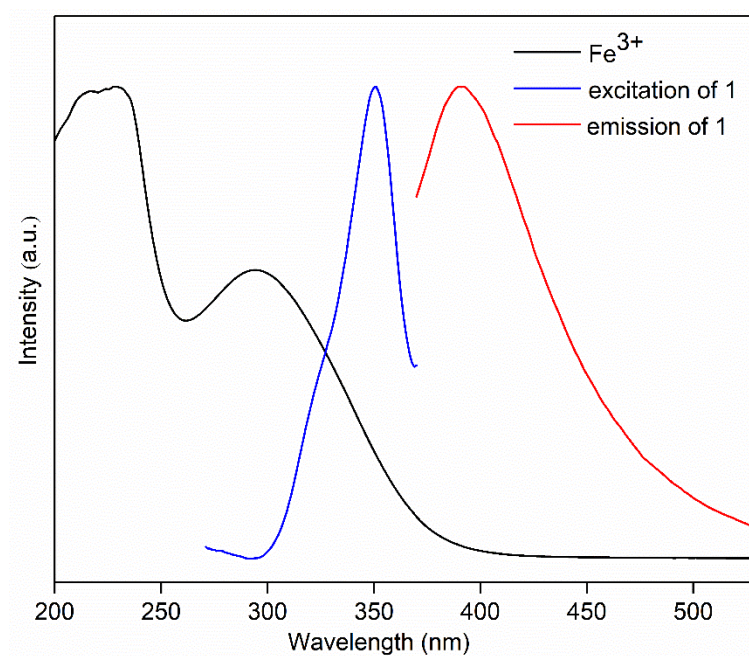

(a).



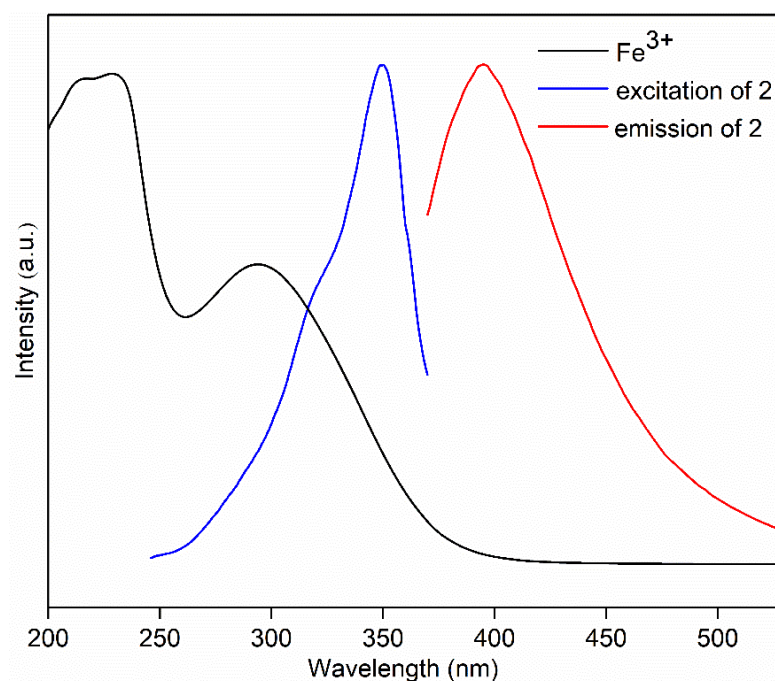

(b).

**Figure S23.** UV-vis absorption spectrum of  $\text{Fe}^{3+}$  ions in aqueous solution and the excitation and emission spectra of (a) **1** and (b) **2**.

**Table S1.** Sensing properties of reported compounds toward various aromatic VOCs.

| Compound                                                                                                     | Metal | $\lambda_{\text{ex}}$ | $\lambda_{\text{em}}$ | $[(I-I_0)/I_0]$ | Analytes       | Reference                                             |
|--------------------------------------------------------------------------------------------------------------|-------|-----------------------|-----------------------|-----------------|----------------|-------------------------------------------------------|
| $[\text{Zn}(\text{L})(1,4\text{-NDC})\cdot\text{H}_2\text{O}]_n$ , <b>1</b>                                  | Zn    | 350                   | 403                   | 1.91            | mesitylene     | this work.                                            |
| $[\text{Cd}(\text{L})(1,4\text{-NDC})(\text{H}_2\text{O})\cdot\text{MeOH}]_n$ , <b>2</b>                     | Cd    | 350                   | 406                   | 1.65            | mesitylene     | this work                                             |
| NUS-1a                                                                                                       | Zn    | 400                   | 504                   |                 | benzene        | J. Am. Chem. Soc. <b>2014</b> , <i>136</i> , 7241.    |
| $\text{Me}_2\text{NH}_2[\text{Cd}(\text{TTCA})(\text{H}_2\text{O})]\cdot 3\text{DMF}\cdot\text{H}_2\text{O}$ | Cd    | 420                   | 501                   | 0.37            | m-xylene       | Cryst. Growth Des. <b>2015</b> , <i>15</i> , 7, 3119. |
| In-bpy                                                                                                       | In    | 306                   | 476                   | 19.5            | p-xylene vapor | Chem. Eur. J. <b>2018</b> , <i>24</i> , 12474.        |
| $\text{Cd}_3(\text{L})(\text{bipy})_2\cdot 4\text{DMA}$                                                      | Cd    | 324                   | 427                   |                 | benzene        | Mater. Horiz. <b>2015</b> , <i>2</i> , 245-251.       |
| $[\text{Zn}_2(\mu_2\text{-BDC})_2(\text{iQ})_2]$                                                             | Zn    | 330                   | 409                   | 27.2            | p-xylene       | Crystals <b>2020</b> , <i>10</i> , 5, 344.            |
| NUS-40-Zn                                                                                                    | Zn    | 420                   | 674                   | 2.76            | o-xylene       | Inorg. Chem. <b>2018</b> , <i>57</i> , 13631.         |
| $[\text{Cd}_2(\text{tppe})(\text{bpdc})_2(\text{H}_2\text{O})]$                                              | Cd    | 380                   | 496                   | 0.90            | mesitylene     | Dalton Trans. <b>2016</b> , <i>45</i> , 14888-14892.  |

Table S2. Sensing properties of reported compounds toward Fe<sup>3+</sup> ions.

| Compound                                                                                                                                      | Analyte<br>s     | Stern-Volmer<br>constant<br>(K <sub>sv</sub> , M <sup>-1</sup> ) | Adjusted<br>R <sup>2</sup> | Limit of<br>detection<br>(μM) | Reference                                               |
|-----------------------------------------------------------------------------------------------------------------------------------------------|------------------|------------------------------------------------------------------|----------------------------|-------------------------------|---------------------------------------------------------|
| [Zn(L)(1,4-NDC)·H <sub>2</sub> O] <sub>n</sub> , <b>1</b>                                                                                     | Fe <sup>3+</sup> | 6.895 × 10 <sup>5</sup>                                          | 0.997                      | 2.35                          | this work                                               |
| [Cd(L)(1,4NDC)H <sub>2</sub> O·MeOH] <sub>n</sub> , <b>2</b>                                                                                  | Fe <sup>3+</sup> | 9.940 × 10 <sup>5</sup>                                          | 0.975                      | 1.01                          | this work                                               |
| [Zn <sub>2</sub> (L) <sub>2</sub> (bpe) <sub>2</sub> (H <sub>2</sub> O) <sub>2</sub> ]                                                        | Fe <sup>3+</sup> | 2.5 × 10 <sup>5</sup>                                            |                            | 25                            | <b>Dalton Trans. 2015, 44</b> , 18795-18803.            |
| {[Cd <sub>2</sub> (dpc)(bib)(H <sub>2</sub> O)]·H <sub>2</sub> O} <sub>n</sub>                                                                | Fe <sup>3+</sup> | 8.939 × 10 <sup>6</sup>                                          | 0.974                      |                               | Journal of S. S. Chemistry. <b>2019</b> , 277, 564–574. |
| [Bmim][Dy(NO <sub>3</sub> ) <sub>4</sub> ]                                                                                                    | Fe <sup>3+</sup> | 2.0 × 10 <sup>6</sup>                                            | 0.982                      | 9.4                           | <b>Dalton Trans. 2016, 45</b> , 1040-1046.              |
| <b>ZSTU-1</b>                                                                                                                                 | Fe <sup>3+</sup> | 2.69 × 10 <sup>6</sup>                                           | 0.990                      | 6.38                          | Journal of S. S. Chemistry. <b>2019</b> , 278, 120-892. |
| [Cd(L)(4-CPA)] <sub>n</sub>                                                                                                                   | Fe <sup>3+</sup> | 3.866 × 10 <sup>5</sup>                                          | 0.988                      | 4.70                          | Polyhedron. <b>2018, 151</b> , 530-536.                 |
| {[Cd <sub>4</sub> (HDDCP) <sub>2</sub> (4,4'-bibp) <sub>2</sub> (H <sub>2</sub> O) <sub>2</sub> ·2.5(DOA)·1.5(H <sub>2</sub> O)] <sub>n</sub> | Fe <sup>3+</sup> | 2.15 × 10 <sup>5</sup>                                           | 0.998                      | 1.34                          | <b>CrystEngComm 2020, 22</b> , 6927.                    |
| {[Cd <sub>2</sub> (HDDCP)(1,4-bib)(H <sub>2</sub> O)]·H <sub>2</sub> O] <sub>n</sub>                                                          |                  | 8.86 × 10 <sup>4</sup>                                           | 0.995                      | 3.32                          |                                                         |
| {[Zn(L)(dcdps)] <sub>n</sub>                                                                                                                  | Fe <sup>3+</sup> | 7.004 × 10 <sup>3</sup>                                          | 0.992                      | 6.21                          | Cryst. Growth Des. <b>2020, 20</b> , 1898.              |
| {Zn(L)(bdc)] <sub>n</sub>                                                                                                                     |                  | 9.066 × 10 <sup>3</sup>                                          | 0.970                      | 4.45                          |                                                         |
| {[Cd(L)(oba)]·0.5DMF] <sub>n</sub>                                                                                                            |                  | 4.984 × 10 <sup>3</sup>                                          | 0.968                      | 11.52                         |                                                         |
| {[Cd(L)(bdc)·(H <sub>2</sub> O) <sub>2</sub> ]·2DMF] <sub>n</sub>                                                                             |                  | 6.387 × 10 <sup>3</sup>                                          | 0.966                      | 6.36                          |                                                         |
| [Zn <sub>2</sub> (L <sub>13</sub> ) <sub>2</sub> (bpe) <sub>2</sub> (H <sub>2</sub> O) <sub>2</sub> ] <sub>n</sub>                            | Fe <sup>3+</sup> | 2.39 × 10 <sup>3</sup>                                           |                            | 2.50                          | <b>Dalton Trans. 2015, 44</b> , 18795.                  |
| [Zn(tpb)(Hbtc)] <sub>n</sub>                                                                                                                  | Fe <sup>3+</sup> | 1.57 × 10 <sup>4</sup>                                           | 0.998                      | 1.95                          | <b>Dalton Trans. 2020, 49</b> , 11201.                  |
| {[Zn(L1)(BTEC)0.5]·3.1H <sub>2</sub> O] <sub>n</sub>                                                                                          | Fe <sup>3+</sup> | 5314                                                             |                            | 6.35                          | <b>CrystEngComm 2021, 23</b> , 1604.                    |
| {[Zn(L2)0.5(BTEC)0.5]·1.5H <sub>2</sub> O] <sub>n</sub>                                                                                       |                  | 6775                                                             | 0.994                      | 5.01                          |                                                         |
| {[Zn <sub>2</sub> (L3)(BTEC)(H <sub>2</sub> O)]·H <sub>2</sub> O] <sub>n</sub>                                                                |                  | 6636                                                             | 0.990                      | 7.02                          |                                                         |
| {[Zn <sub>2</sub> (L4)(BTEC)]·H <sub>2</sub> O] <sub>n</sub>                                                                                  |                  | 6424                                                             |                            | 6.19                          |                                                         |
| Eu <sup>3+</sup> @1                                                                                                                           | Fe <sup>3+</sup> | 5.12 × 10 <sup>3</sup>                                           | 0.999                      | 0.5                           | <b>J. Mater. Chem. A. 2014, 2</b> , 13691.              |
| {[Cd(5-asba)(bimb)] <sub>n</sub>                                                                                                              | Fe <sup>3+</sup> | 1.78 × 10 <sup>4</sup>                                           |                            | 1.87                          | <b>J. Mater. Chem. C. 2016, 4</b> , 11404.              |
| {[Zn <sub>2</sub> (1,4-ndc) <sub>2</sub> (3-abpt)]·2DMF] <sub>n</sub>                                                                         | Fe <sup>3+</sup> | 2.38 × 10 <sup>4</sup>                                           | 0.992                      |                               | <b>New J. Chem. 2017, 41</b> , 8107.                    |
| {[Cd(1,4-ndc)(3-abit)]·H <sub>2</sub> O] <sub>n</sub>                                                                                         |                  | 9.54 × 10 <sup>3</sup>                                           | 0.993                      |                               |                                                         |
| [Zn <sub>2</sub> (oba) <sub>2</sub> (bpta)]·3DMF] <sub>n</sub>                                                                                | Fe <sup>3+</sup> | 6.50 × 10 <sup>4</sup>                                           | 0.990                      | 3.00                          | Polyhedron. <b>2019, 166</b> , 166.                     |
